# Supplementary material for: Impact of Dimensionality on Optoelectronic Properties of Hybrid Perovskites
Source: Hindawi journal article supplement (doi:10.1155/2021/8822703), 2021-03-30
Supplement: f1 [file 8822703.f1.docx]

**Impact of Dimensionality on Optoelectronic Properties of Hybrid perovskites**

Washat Ware #, Tia Wright #, Antony Davita±, Evgeny Danilov§, Bhoj Gautam#, ¥,*

#Department of Chemistry, Physics and Materials Science, Fayetteville State University, Fayetteville, North Carolina 28301, United States

±Jack Britt High School, Fayetteville, North Carolina 28306, United States
§Department of Chemistry, North Carolina State University, Raleigh, North Carolina 27695, USA

¥Department of Physics and Organic and Carbon Electronics Laboratory, North Carolina State University, Raleigh, North Carolina 27695, USA

Corresponding Author: [*bgautam@uncfsu.edu](mailto:*bgautam@uncfsu.edu)

| 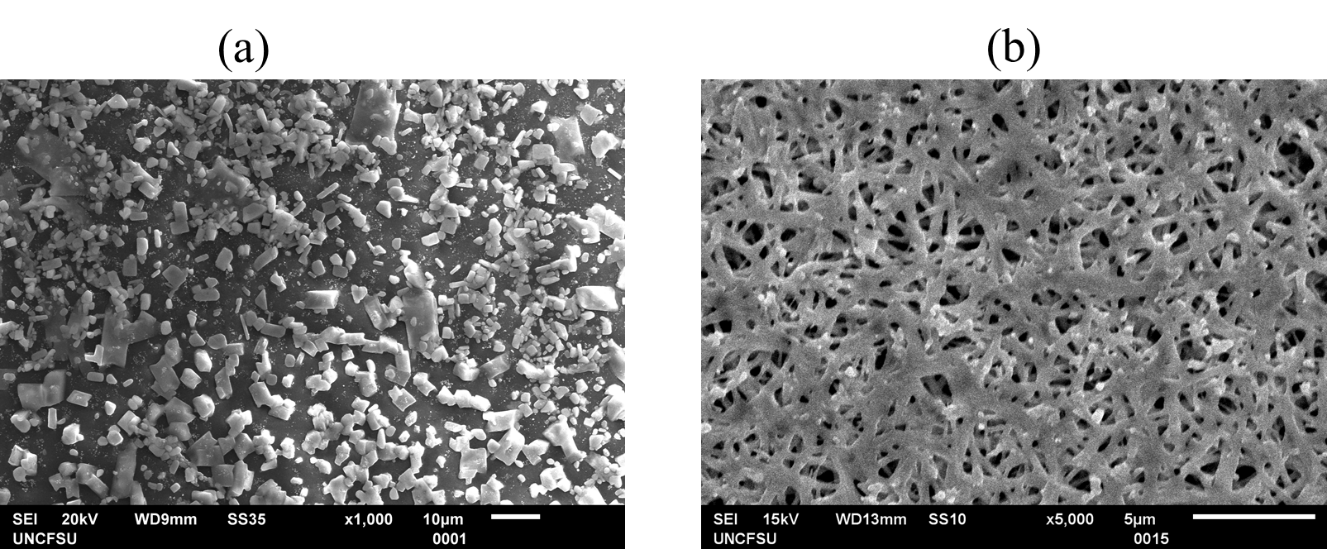  **Figure S1.** SEM images of (a) (CH3NH3)2Pb(SCN)2I2  and (b) CH3NH3PbI3 thin films. |
| --- |
